# Supplementary material
Source: Elsevier journal article supplement (https://authors.library.caltech.edu/35354/2/mmc1.doc)
Supplement: mmc1 [file mmc1.doc]

**Supplementary material**

We used the stereo pair of HiRISE images PSP_007018_1255 and PSP_007229_1255 with a spatial resolution of 25 cm/pixel and 50 cm/pixel respectively. Firstly, the images went through radiometric calibration and optical distortions correction using ISIS-3 (Integrated Software for Imagers and Spectrometers) from the USGS (Anderson et al., 2004; Torson and Becker, 1997). No jitter correction has been done. In addition, regarding the elapsed time between the two observation dates (see Table A1) no topographic change is assumed. SOCET SET® formatted products, including ephemeris and camera geometry extracted from the SPICE kernels, are thus obtained. Elevation at tie points (common points to each image) is obtained from the MOLA (Mars Orbiter Laser Altimeter) PEDR products. Later, terrain extraction procedure scans the stereo pair to correlate them and compute the parallax into height with a spatial resolution of 1.5m/post. We used a second pass from a difference of Gaussian filtered images and used the first DTM as a seed in order to improve the extraction result for gullies. Finally Planar© stereo monitor has been used to control the DTM quality by draping contour lines over the rectified images. The correlation map (provided by SOCET SET® and computed from the epipolar images) shows that pixels located on gullies are well correlated (see Fig. A1), implying a good elevation extraction and the possibility to compile a 3D view of a part of the Russell crater dune. We estimated this vertical precision with the standard formula of the expected vertical precision defined as:

*evp* = *r* *GSD* *z* / *b*

where *evp* is the expected vertical precision, *GSD* is the ground sample distance, *r* is the accuracy in pixels for which features can be matched, *b* is the base distance between points where the two images are acquired and has been estimated to be 0.2 by Kirk et al. (2008) and *z* is the flying elevation. We thus obtained a more realistic value of *evp* = 0.62 m for the whole DTM grid. In our study, we considered a vertical uncertainties of 0.25 m in our study area due to the high correlation coefficient (>90) along the gullies.


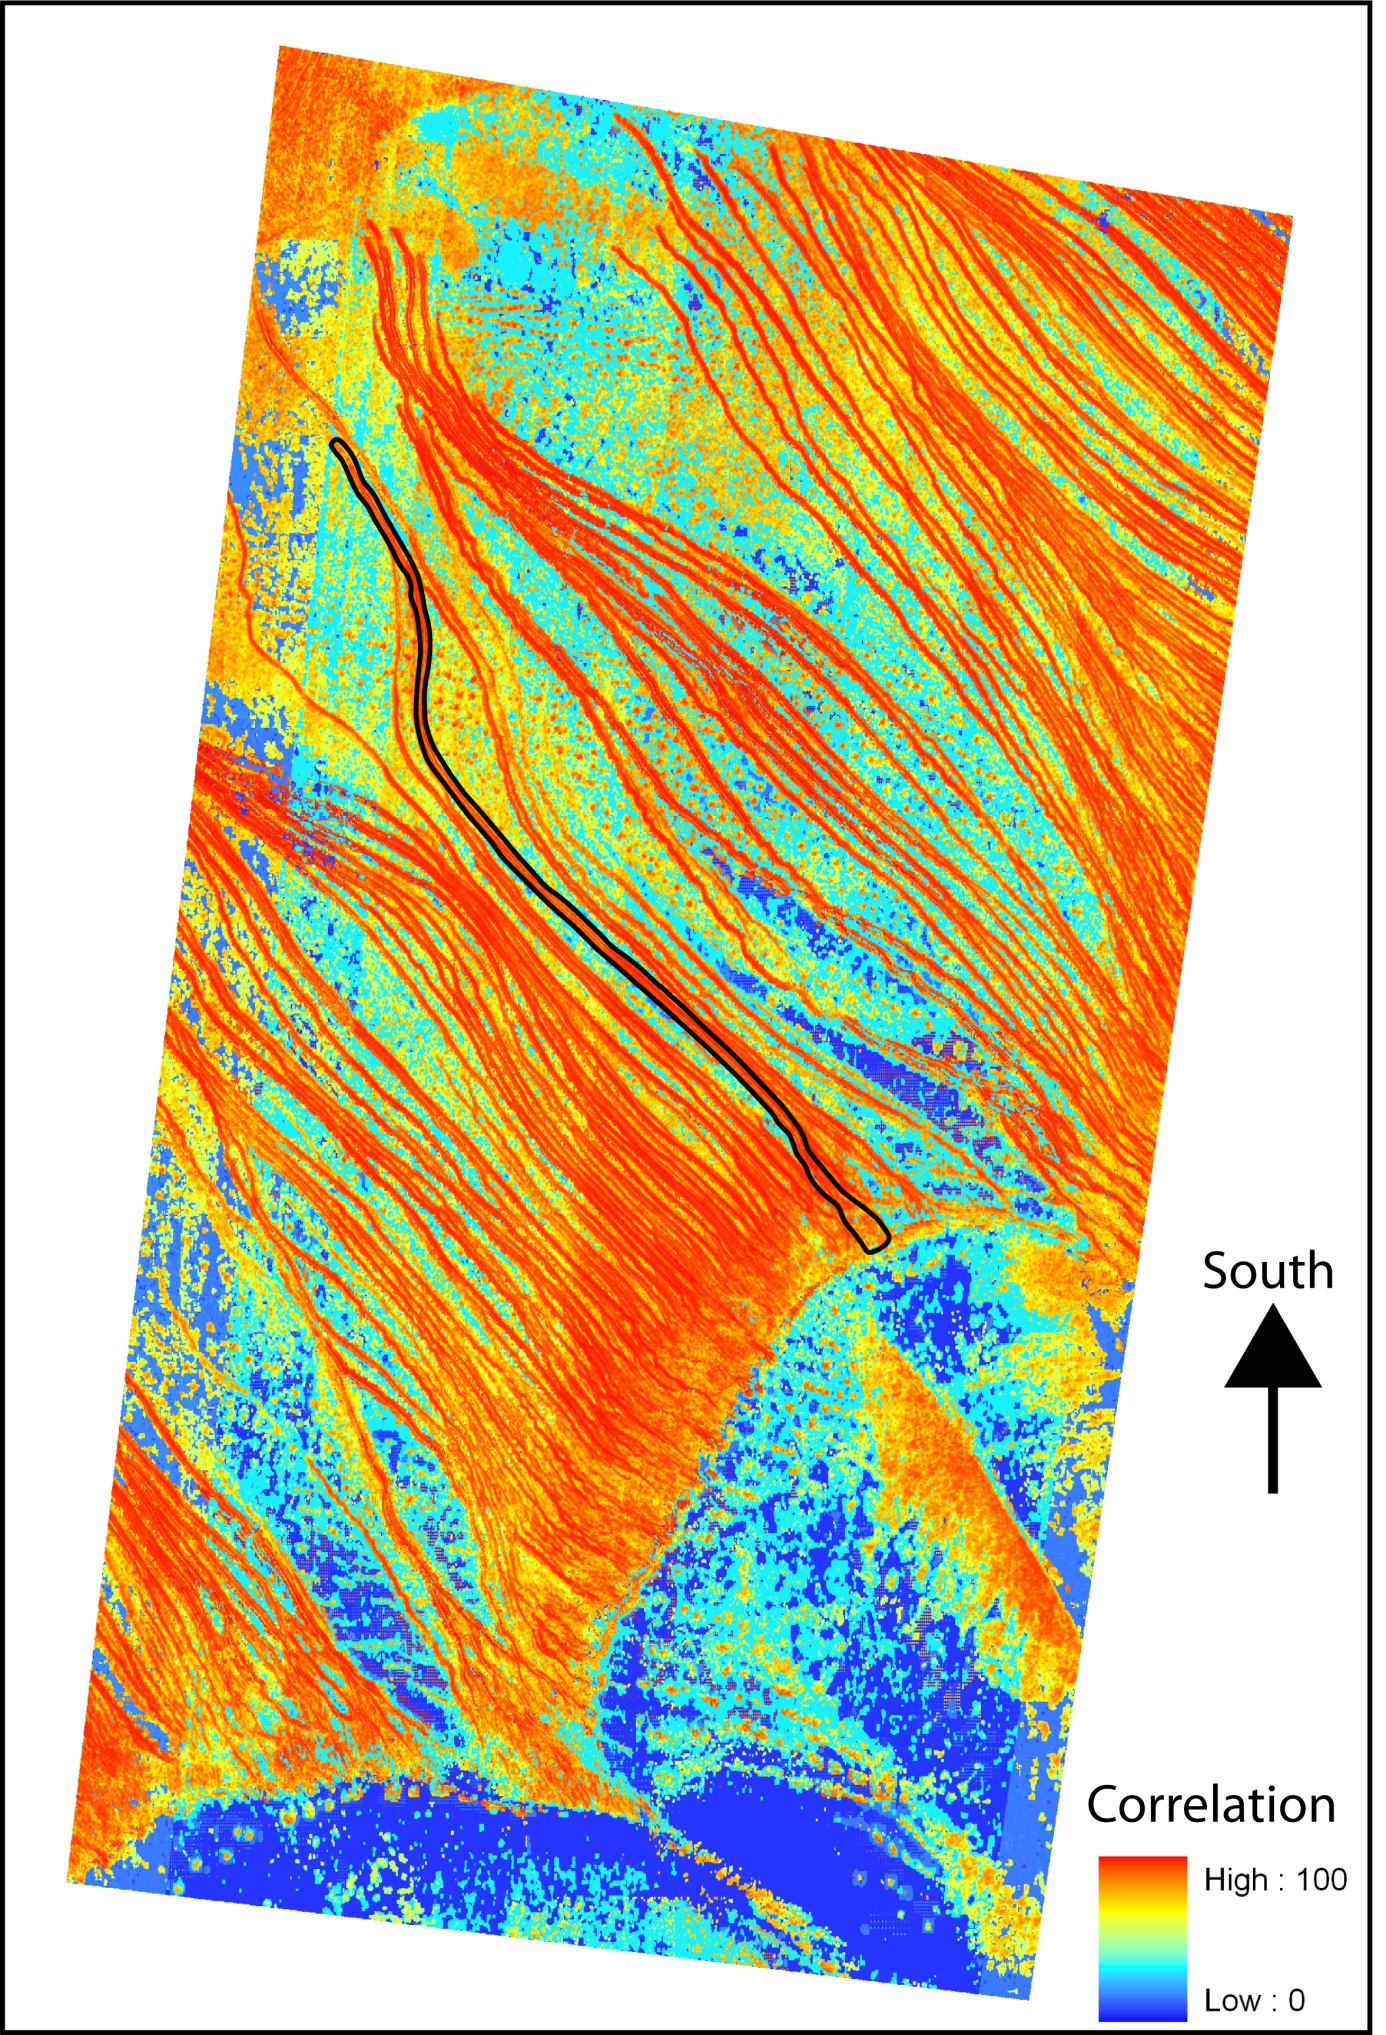


Figure. A1 Figure of merit obtained from Stereo Extraction and location of the studied gully (black outline). Values above 40 (warm colors) indicate a good correlation coefficient. Values in cool colors correspond to either, bad correlation, processed post, special pixels (high slope, low brightness ratio...) and might not be used for analysis. This map shows that the studied gully is located in a high correlation area (> 90).


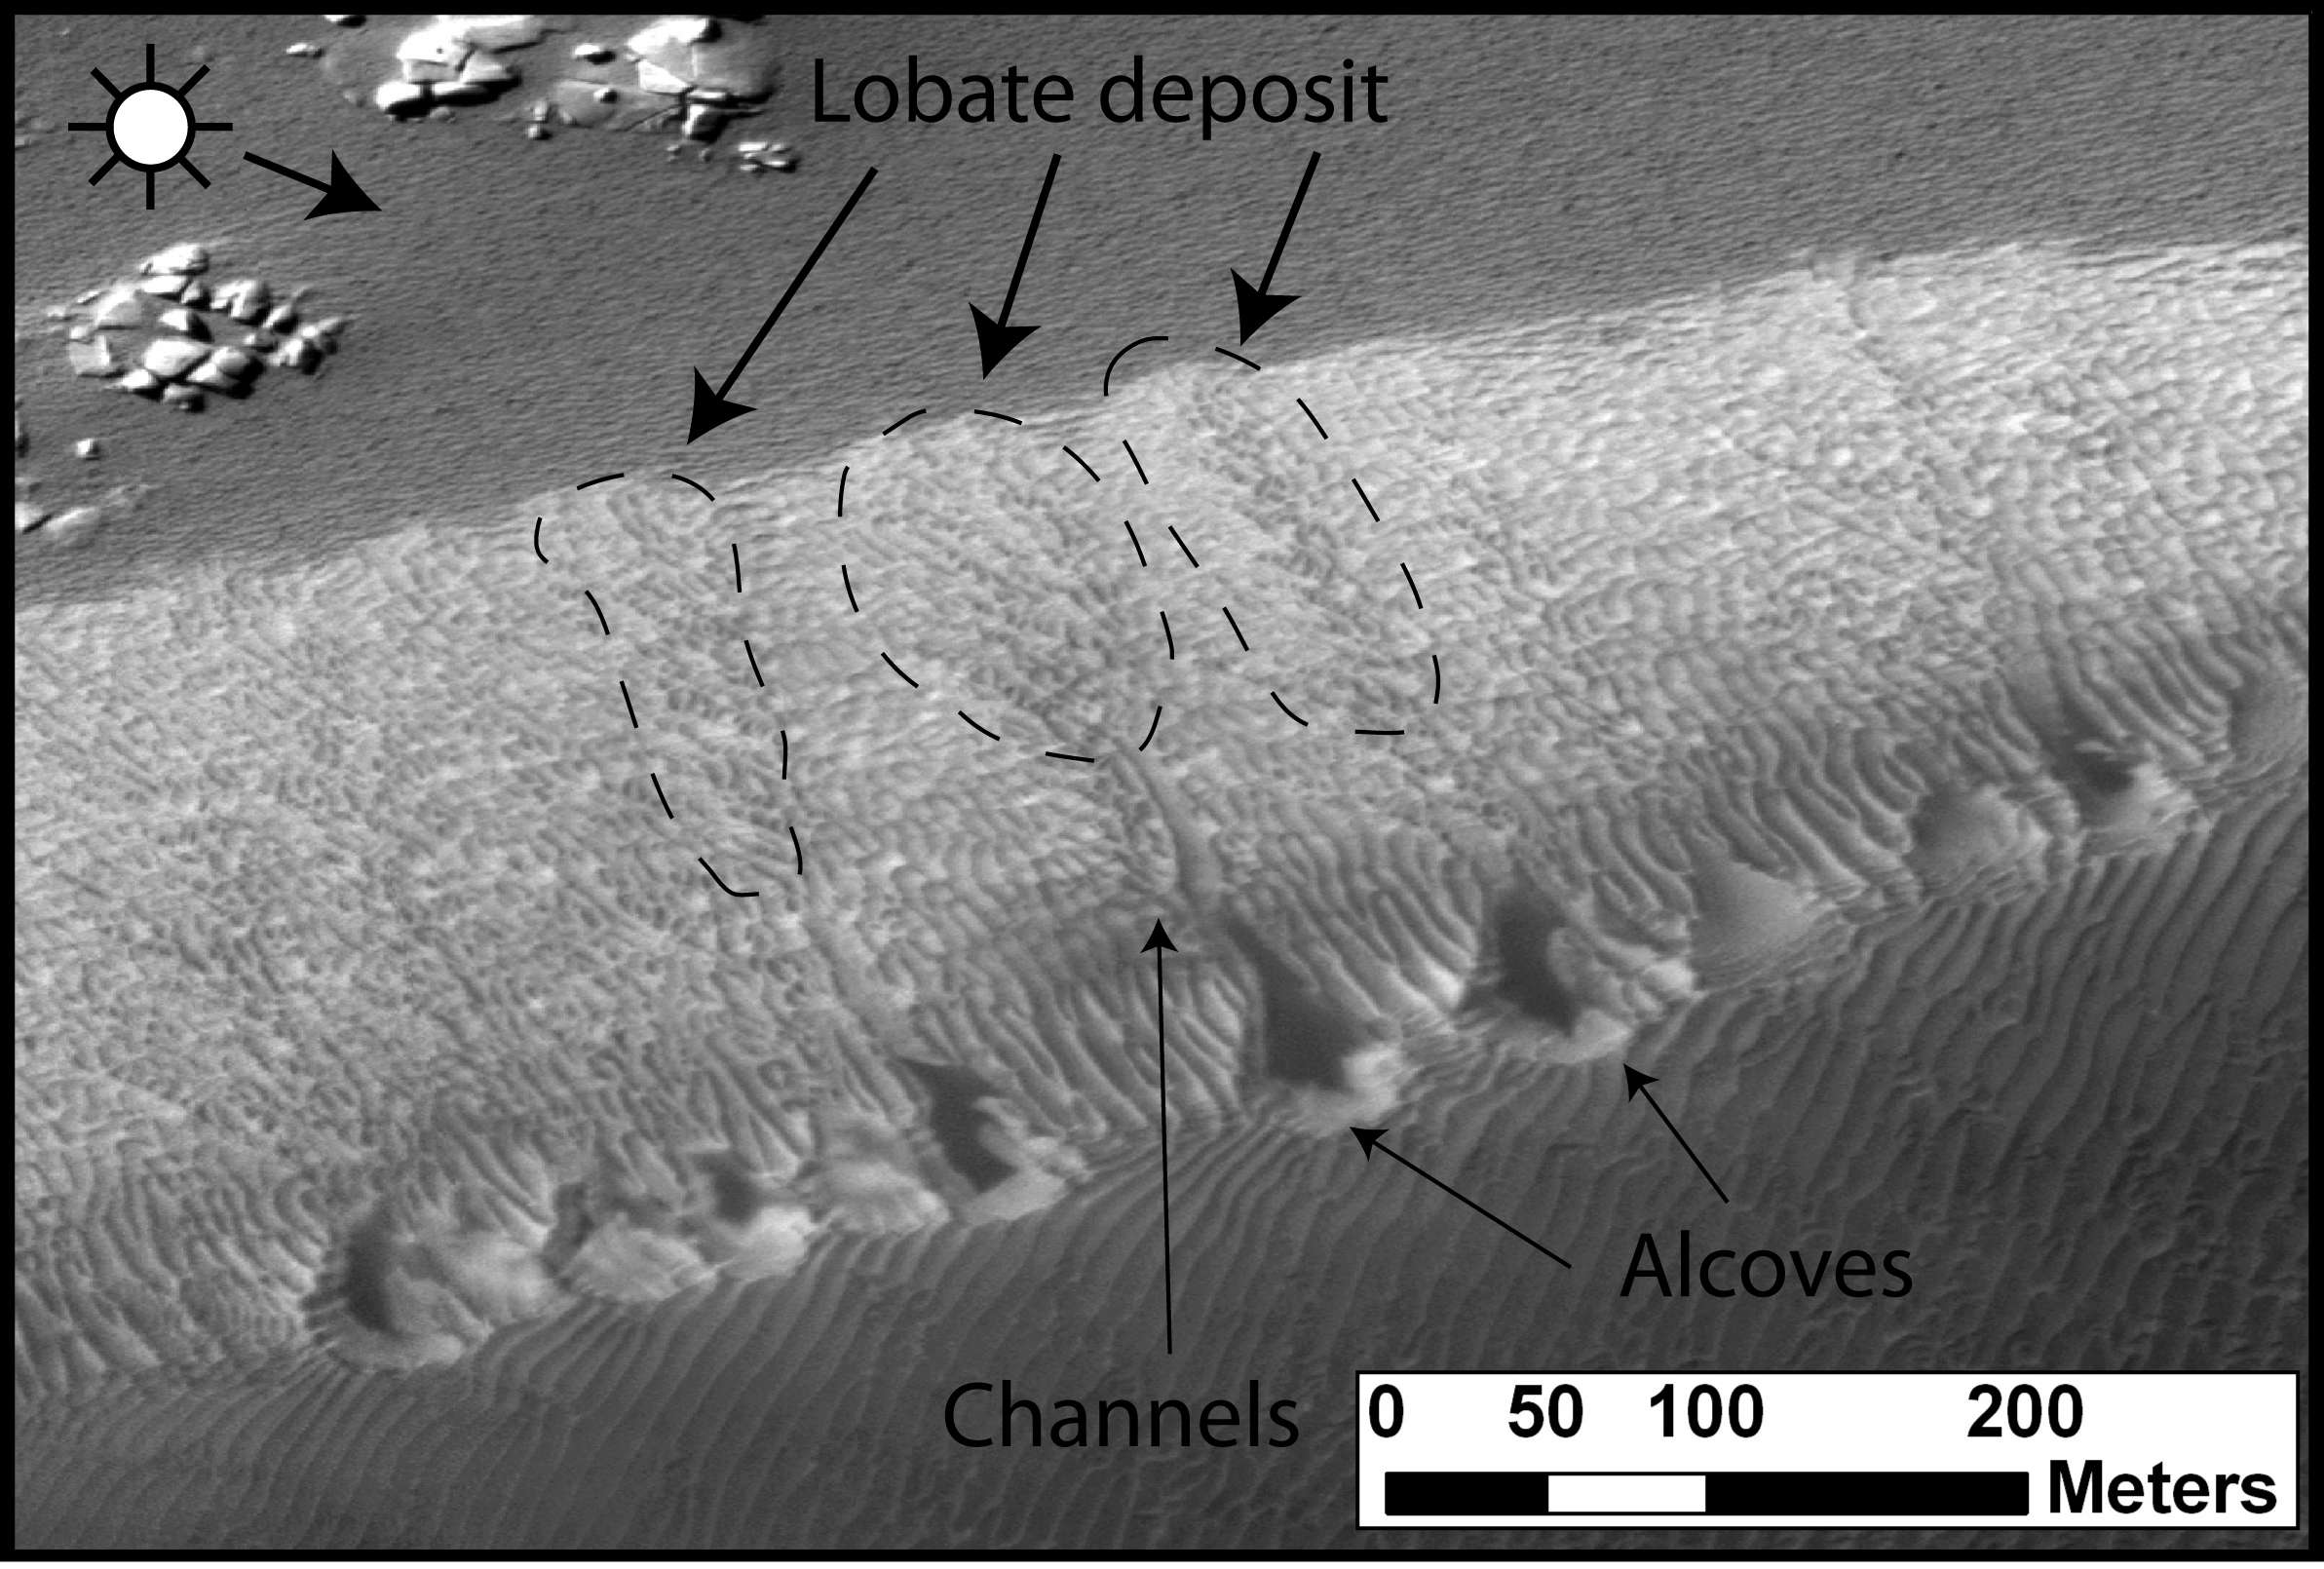


Figure A2. Examples of small gullies which present a lobate deposit on secondary dunes located few hundred meters W of the megadune Russell (HiRISE image PSP_006161_1250).

Table A1. HiRISE images properties.

|  | PSP_007018_1255 | PSP_007229_1255 |
| --- | --- | --- |
| Pixel size *(m/pixel)* | 0.254 | 0.507 |
| Emission Angle | 3.4º | 5.7º |
| Local Time | 14:52 | 15:02 |
| Obs. Date *(DD/MM/YYYY)* | 25/01/2008 | 10/02/2008 |
| Solar Longitude | 22.5º | 30.1º |
